# Supplementary material for: Choosing the Best Plant for the Job: A Cost-Effective Assay to Prescreen Ancient Plant Remains Destined for Shotgun Sequencing
Source: PLoS One. 2012 Sep 20;7(9):e45644. doi: 10.1371/journal.pone.0045644 (PMC3447772; doi:10.1371/journal.pone.0045644)
Supplement: Spreadsheet S1 — Microsoft Excel workbook with worksheets for master mix setup, microwell plate layout, and automated quality-checking and analysis of qPCR results. (XLSX) [file pone.0045644.s001.xlsx]

## Sheet: Directions
Choosing the best plant for the job: a cost-effective assay to prescreen ancient plant remains destined for shotgun sequencing
Nathan Wales, J. Alberto Romero-Navarro, Enrico Cappellini, and M. Thomas P. Gilbert
Spreadsheet S1
Directions
1. Prepare ancient plant samples as directed in manuscript.
2. Select up to 7 samples to be used in the qPCR assay.
3. Type the names of the samples in the "Master mixes" worksheet.
List samples in consecutive order (i.e., do not skip name slots if there are less than 7 samples).
Delete names not being used, and worksheet will update calculations/plate layout.
Tip: Master mix page can be altered for different stock concentrations.
4. Make first master mix (without primers).
5. Pipette the indicated volume into four tubes and add one primer set to each tube.
6. Create a dilution series for each sample: 100%, 10%, and 1%.
Tip: Put dilution series in strip tubes so multichannel pipettes can be used.
7. Pipette samples and master mixes according to the "Plate layout" worksheet.
8. Run real-time qPCR according to specified protocol.
Tip: Names can be imported or pasted into Roche LightCycler software using "For software" worksheet.
9. Following qPCR run, enter data into "Raw qPCR data" worksheet.
Data from LightCycler software can be pasted directly into worksheet.
Alternatively, Ct values for the corresponding wells can be manually entered into worksheet.
Check that Ct values are in column D, starting with row 3.
10. Sample worksheets 1-7 automatically access the raw data and analyze it.
The left-hand side of the worksheet (columns A-E) is used to check the reliability of the data.
Each Ct value of the sample and dilutions are checked against the corresponding negative control.
Ct values are compared to check if values increase along each dilution series.
The right-hand side of the worksheet (columns G-I) gives the relative amounts of the types of DNA.
Tip: Unreliable data is automatically dimmed.
Generally the non-diluted sample provides sufficient information.
11. Compare and contrast different samples using the maximum DNA and relative percentages.
Figure 1 provides guidelines for selecting the best sample for shotgun sequencing.

## Sheet: Master mixes
	Sample names
Sample 1:	sample 1		Sample names must be entered for automated master mix calculations and plate design. Plate layout will reconfigure based upon number of samples.
Sample 2:	sample 2
Sample 3:	sample 3
Sample 4:	sample 4
Sample 5:	sample 5
Sample 6:	sample 6
Sample 7:	sample 7
Number of samples	7
First Master Mix
	stock conc.	unit	final conc.	unit	Volume per reaction (µL)	Volume in master mix
Template		ng/µL		ng	1	Add to plate
dNTPs	25	mM	0.2	mM	0.2	20
Primer F and R mix	10	µM (each)	0.4	µM	1	Add to 2nd MM
AmpliTaq Gold	5	U/µL	0.04	U/µL	0.2	20
AmpliTaq buffer	10	x	1	x	2.5	250
MgCl2	25	mM	2.5	mM	2.5	250
SyBr/Rox					1	100
ddH2O					16.6	1660
				Total volume per reaction (µL):	25
				Total reactions (12 * n samples + 4 controls):	88
				Master mix multiplication (allowing for pipette errors):	100
				Total volume in first master mix (µL):	2300
Second Master Mix (Make for all 4 primer sets)
	stock conc.	unit	final conc.	unit	Volume per reaction (µL)	Volume in master mix
Template		ng/µL		ng	1	Add to plate
Primer F and R mix	10	µM	0.4	µM	1	23.5
1st Master Mix	From above				23	540.5
				Total volume per reaction (µL):	25
				Total reactions (3 * n samples + 1 control):	22
				Master mix multiplication (allowing for pipette errors):	23.5
				Total volume in second master mix (µL):	564

## Sheet: Plate layout
Recommended Plate Layout		sample 1 dilutions			sample 2 dilutions			sample 3 dilutions			sample 4 dilutions
		1	0.1	0.01	100%	10%	1%	100%	10%	1%	100%	10%	1%
Primer set	Well	1	2	3	4	5	6	7	8	9	10	11	12
Plant nuclear	A	sample 1.library.nuclear	sample 1.1.nuclear	sample 1.01.nuclear	sample 2.library.nuclear	sample 2.1.nuclear	sample 2.01.nuclear	sample 3.library.nuclear	sample 3.1.nuclear	sample 3.01.nuclear	sample 4.library.nuclear	sample 4.1.nuclear	sample 4.01.nuclear
Plant chloroplast	B	sample 1.library.chlor	sample 1.1.chlor	sample 1.01.chlor	sample 2.library.chlor	sample 2.1.chlor	sample 2.01.chlor	sample 3.library.chlor	sample 3.1.chlor	sample 3.01.chlor	sample 4.library.chlor	sample 4.1.chlor	sample 4.01.chlor
Bacteria	C	sample 1.library.bact	sample 1.1.bact	sample 1.01.bact	sample 2.library.bact	sample 2.1.bact	sample 2.01.bact	sample 3.library.bact	sample 3.1.bact	sample 3.01.bact	sample 4.library.bact	sample 4.1.bact	sample 4.01.bact
Fungi	D	sample 1.library.fung	sample 1.1.fung	sample 1.01.fung	sample 2.library.fung	sample 2.1.fung	sample 2.01.fung	sample 3.library.fung	sample 3.1.fung	sample 3.01.fung	sample 4.library.fung	sample 4.1.fung	sample 4.01.fung
Plant nuclear	E	sample 5.library.nuclear	sample 5.1.nuclear	sample 5.01.nuclear	sample 6.library.nuclear	sample 6.1.nuclear	sample 6.01.nuclear	sample 7.library.nuclear	sample 7.1.nuclear	sample 7.01.nuclear	Nucl Neg
Plant chloroplast	F	sample 5.library.chlor	sample 5.1.chlor	sample 5.01.chlor	sample 6.library.chlor	sample 6.1.chlor	sample 6.01.chlor	sample 7.library.chloro	sample 7.1.chlor	sample 7.01.chlor	Chloro Neg
Bacteria	G	sample 5.library.bact	sample 5.1.bact	sample 5.01.bact	sample 6.library.bact	sample 6.1.bact	sample 6.01.bact	sample 7.library.bact	sample 7.1.bact	sample 7.01.bact	Bact Neg
Fungi	H	sample 5.library.fung	sample 5.1.fung	sample 5.01.fung	sample 6.library.fung	sample 6.1.fung	sample 6.01.fung	sample 7.library.fung	sample 7.1.fung	sample 7.01.fung	Fungi Neg
		100%	10%	1%	100%	10%	1%	100%	10%	1%
		sample 5 dilutions			sample 6 dilutions			sample 7 dilutions			Negative Controls
					qPCR Condtions
					Step	Temp (˚C)		Time (min:sec)
					1	95		10:00
					2	95		0:30
					3	54		1:00
					4	72		1:00
					5	Repeat steps 2–4 for 50 cycles
					6	Melting curve

## Sheet: For software
General:Pos	General:Sample Name
A1	sample 1.library.nuclear
A2	sample 1.1.nuclear
A3	sample 1.01.nuclear
A4	sample 2.library.nuclear
A5	sample 2.1.nuclear
A6	sample 2.01.nuclear
A7	sample 3.library.nuclear
A8	sample 3.1.nuclear
A9	sample 3.01.nuclear
A10	sample 4.library.nuclear
A11	sample 4.1.nuclear
A12	sample 4.01.nuclear
B1	sample 1.library.chlor
B2	sample 1.1.chlor
B3	sample 1.01.chlor
B4	sample 2.library.chlor
B5	sample 2.1.chlor
B6	sample 2.01.chlor
B7	sample 3.library.chlor
B8	sample 3.1.chlor
B9	sample 3.01.chlor
B10	sample 4.library.chlor
B11	sample 4.1.chlor
B12	sample 4.01.chlor
C1	sample 1.library.bact
C2	sample 1.1.bact
C3	sample 1.01.bact
C4	sample 2.library.bact
C5	sample 2.1.bact
C6	sample 2.01.bact
C7	sample 3.library.bact
C8	sample 3.1.bact
C9	sample 3.01.bact
C10	sample 4.library.bact
C11	sample 4.1.bact
C12	sample 4.01.bact
D1	sample 1.library.fung
D2	sample 1.1.fung
D3	sample 1.01.fung
D4	sample 2.library.fung
D5	sample 2.1.fung
D6	sample 2.01.fung
D7	sample 3.library.fung
D8	sample 3.1.fung
D9	sample 3.01.fung
D10	sample 4.library.fung
D11	sample 4.1.fung
D12	sample 4.01.fung
E1	sample 5.library.nuclear
E2	sample 5.1.nuclear
E3	sample 5.01.nuclear
E4	sample 6.library.nuclear
E5	sample 6.1.nuclear
E6	sample 6.01.nuclear
E7	sample 7.library.nuclear
E8	sample 7.1.nuclear
E9	sample 7.01.nuclear
E10	Nucl Neg
F1	sample 5.library.chlor
F2	sample 5.1.chlor
F3	sample 5.01.chlor
F4	sample 6.library.chlor
F5	sample 6.1.chlor
F6	sample 6.01.chlor
F7	sample 7.library.chloro
F8	sample 7.1.chlor
F9	sample 7.01.chlor
F10	Chloro Neg
G1	sample 5.library.bact
G2	sample 5.1.bact
G3	sample 5.01.bact
G4	sample 6.library.bact
G5	sample 6.1.bact
G6	sample 6.01.bact
G7	sample 7.library.bact
G8	sample 7.1.bact
G9	sample 7.01.bact
G10	Bact Neg
H1	sample 5.library.fung
H2	sample 5.1.fung
H3	sample 5.01.fung
H4	sample 6.library.fung
H5	sample 6.1.fung
H6	sample 6.01.fung
H7	sample 7.library.fung
H8	sample 7.1.fung
H9	sample 7.01.fung
H10	Fungi Neg

## Sheet: Raw qPCR data
Experiment: Name
Include	Color	Pos	Name	Ct	Concentration	Standard	Status
TRUE		A1							Data from real-time qPCR should be pasted on this worksheet.
TRUE		A2							Ct values are used to calculate all 7 samples.
TRUE		A3							Following the plate layout is essential.
TRUE		A4							Double check that well position is correct.
TRUE		A5
TRUE		A6
TRUE		A7
TRUE		A8
TRUE		A9
TRUE		A10
TRUE		A11
TRUE		A12
TRUE		B1
TRUE		B2
TRUE		B3
TRUE		B4
TRUE		B5
TRUE		B6
TRUE		B7
TRUE		B8
TRUE		B9
TRUE		B10
TRUE		B11
TRUE		B12
TRUE		C1
TRUE		C2
TRUE		C3
TRUE		C4
TRUE		C5
TRUE		C6
TRUE		C7
TRUE		C8
TRUE		C9
TRUE		C10
TRUE		C11
TRUE		C12
TRUE		D1
TRUE		D2
TRUE		D3
TRUE		D4
TRUE		D5
TRUE		D6
TRUE		D7
TRUE		D8
TRUE		D9
TRUE		D10
TRUE		D11
TRUE		D12
TRUE		E1
TRUE		E2
TRUE		E3
TRUE		E4
TRUE		E5
TRUE		E6
TRUE		E7
TRUE		E8
TRUE		E9
TRUE		E10
TRUE		E11
TRUE		E12
TRUE		F1
TRUE		F2
TRUE		F3
TRUE		F4
TRUE		F5
TRUE		F6
TRUE		F7
TRUE		F8
TRUE		F9
TRUE		F10
TRUE		F11
TRUE		F12
TRUE		G1
TRUE		G2
TRUE		G3
TRUE		G4
TRUE		G5
TRUE		G6
TRUE		G7
TRUE		G8
TRUE		G9
TRUE		G10
TRUE		G11
TRUE		G12
TRUE		H1
TRUE		H2
TRUE		H3
TRUE		H4
TRUE		H5
TRUE		H6
TRUE		H7
TRUE		H8
TRUE		H9
TRUE		H10
TRUE		H11
TRUE		H12

## Sheet: Sample 1
	Sample 1:		sample 1
							100% library
Primer set	Name	Ct	10% dilution delay (3.32 expected)	Reliability of Ct (vs. control)		Min reliable Ct:	no good value	[unreliable shaded]
Plant nuclear DNA (tRNA-His)	100% library	0		Do not trust value			Cycles after min Ct	DNA Copies Relative to Max
	10% dilution	0	0	Do not trust value		Plant nuclear	#VALUE!	#VALUE!
	1% dilution	0	0	Do not trust value		Chloroplast	#VALUE!	#VALUE!
	Negative control	0				Bacteria	#VALUE!	#VALUE!
						Fungi	#VALUE!	#VALUE!
Plant chloroplast DNA (rbcL)	100% library	0		Do not trust value
	10% dilution	0	0	Do not trust value			10% library
	1% dilution	0	0	Do not trust value		Min reliable Ct:	no good value	[unreliable shaded]
	Negative control	0					Cycles after min Ct	DNA Copies Relative to Max
						Plant nuclear	#VALUE!	#VALUE!
Bacteria DNA (16S rRNA)	100% library	0		Do not trust value		Chloroplast	#VALUE!	#VALUE!
	10% dilution	0	0	Do not trust value		Bacteria	#VALUE!	#VALUE!
	1% dilution	0	0	Do not trust value		Fungi	#VALUE!	#VALUE!
	Negative control	0
							1% library
Fungi DNA (18S rRNA)	100% library	0		Do not trust value		Min reliable Ct:	no good value	[unreliable shaded]
	10% dilution	0	0	Do not trust value			Cycles after min Ct	DNA Copies Relative to Max
	1% dilution	0	0	Do not trust value		Plant nuclear	#VALUE!	#VALUE!
	Negative control	0				Chloroplast	#VALUE!	#VALUE!
						Bacteria	#VALUE!	#VALUE!
						Fungi	#VALUE!	#VALUE!

## Sheet: Sample 2
	Sample 2:		sample 2
							100% library
Primer set	Name	Ct	10% dilution delay (3.32 expected)	Reliability of Ct (vs. control)		Min reliable Ct:	no good value	[unreliable shaded]
Plant nuclear DNA (tRNA-His)	100% library	0		Do not trust value			Cycles after min Ct	DNA Copies Relative to Max
	10% dilution	0	0	Do not trust value		Plant nuclear	#VALUE!	#VALUE!
	1% dilution	0	0	Do not trust value		Chloroplast	#VALUE!	#VALUE!
	Negative control	0				Bacteria	#VALUE!	#VALUE!
						Fungi	#VALUE!	#VALUE!
Plant chloroplast DNA (rbcL)	100% library	0		Do not trust value
	10% dilution	0	0	Do not trust value			10% library
	1% dilution	0	0	Do not trust value		Min reliable Ct:	no good value	[unreliable shaded]
	Negative control	0					Cycles after min Ct	DNA Copies Relative to Max
						Plant nuclear	#VALUE!	#VALUE!
Bacteria DNA (16S rRNA)	100% library	0		Do not trust value		Chloroplast	#VALUE!	#VALUE!
	10% dilution	0	0	Do not trust value		Bacteria	#VALUE!	#VALUE!
	1% dilution	0	0	Do not trust value		Fungi	#VALUE!	#VALUE!
	Negative control	0
							1% library
Fungi DNA (18S rRNA)	100% library	0		Do not trust value		Min reliable Ct:	no good value	[unreliable shaded]
	10% dilution	0	0	Do not trust value			Cycles after min Ct	DNA Copies Relative to Max
	1% dilution	0	0	Do not trust value		Plant nuclear	#VALUE!	#VALUE!
	Negative control	0				Chloroplast	#VALUE!	#VALUE!
						Bacteria	#VALUE!	#VALUE!
						Fungi	#VALUE!	#VALUE!

## Sheet: Sample 3
	Sample 3:		sample 3
							100% library
Primer set	Name	Ct	10% dilution delay (3.32 expected)	Reliability of Ct (vs. control)		Min reliable Ct:	no good value	[unreliable shaded]
Plant nuclear DNA (tRNA-His)	100% library	0		Do not trust value			Cycles after min Ct	DNA Copies Relative to Max
	10% dilution	0	0	Do not trust value		Plant nuclear	#VALUE!	#VALUE!
	1% dilution	0	0	Do not trust value		Chloroplast	#VALUE!	#VALUE!
	Negative control	0				Bacteria	#VALUE!	#VALUE!
						Fungi	#VALUE!	#VALUE!
Plant chloroplast DNA (rbcL)	100% library	0		Do not trust value
	10% dilution	0	0	Do not trust value			10% library
	1% dilution	0	0	Do not trust value		Min reliable Ct:	no good value	[unreliable shaded]
	Negative control	0					Cycles after min Ct	DNA Copies Relative to Max
						Plant nuclear	#VALUE!	#VALUE!
Bacteria DNA (16S rRNA)	100% library	0		Do not trust value		Chloroplast	#VALUE!	#VALUE!
	10% dilution	0	0	Do not trust value		Bacteria	#VALUE!	#VALUE!
	1% dilution	0	0	Do not trust value		Fungi	#VALUE!	#VALUE!
	Negative control	0
							1% library
Fungi DNA (18S rRNA)	100% library	0		Do not trust value		Min reliable Ct:	no good value	[unreliable shaded]
	10% dilution	0	0	Do not trust value			Cycles after min Ct	DNA Copies Relative to Max
	1% dilution	0	0	Do not trust value		Plant nuclear	#VALUE!	#VALUE!
	Negative control	0				Chloroplast	#VALUE!	#VALUE!
						Bacteria	#VALUE!	#VALUE!
						Fungi	#VALUE!	#VALUE!

## Sheet: Sample 4
	Sample 4:		sample 4
							100% library
Primer set	Name	Ct	10% dilution delay (3.32 expected)	Reliability of Ct (vs. control)		Min reliable Ct:	no good value	[unreliable shaded]
Plant nuclear DNA (tRNA-His)	100% library	0		Do not trust value			Cycles after min Ct	DNA Copies Relative to Max
	10% dilution	0	0	Do not trust value		Plant nuclear	#VALUE!	#VALUE!
	1% dilution	0	0	Do not trust value		Chloroplast	#VALUE!	#VALUE!
	Negative control	0				Bacteria	#VALUE!	#VALUE!
						Fungi	#VALUE!	#VALUE!
Plant chloroplast DNA (rbcL)	100% library	0		Do not trust value
	10% dilution	0	0	Do not trust value			10% library
	1% dilution	0	0	Do not trust value		Min reliable Ct:	no good value	[unreliable shaded]
	Negative control	0					Cycles after min Ct	DNA Copies Relative to Max
						Plant nuclear	#VALUE!	#VALUE!
Bacteria DNA (16S rRNA)	100% library	0		Do not trust value		Chloroplast	#VALUE!	#VALUE!
	10% dilution	0	0	Do not trust value		Bacteria	#VALUE!	#VALUE!
	1% dilution	0	0	Do not trust value		Fungi	#VALUE!	#VALUE!
	Negative control	0
							1% library
Fungi DNA (18S rRNA)	100% library	0		Do not trust value		Min reliable Ct:	no good value	[unreliable shaded]
	10% dilution	0	0	Do not trust value			Cycles after min Ct	DNA Copies Relative to Max
	1% dilution	0	0	Do not trust value		Plant nuclear	#VALUE!	#VALUE!
	Negative control	0				Chloroplast	#VALUE!	#VALUE!
						Bacteria	#VALUE!	#VALUE!
						Fungi	#VALUE!	#VALUE!

## Sheet: Sample 5
	Sample 5:		sample 5
							100% library
Primer set	Name	Ct	10% dilution delay (3.32 expected)	Reliability of Ct (vs. control)		Min reliable Ct:	no good value	[unreliable shaded]
Plant nuclear DNA (tRNA-His)	100% library	0		Do not trust value			Cycles after min Ct	DNA Copies Relative to Max
	10% dilution	0	0	Do not trust value		Plant nuclear	#VALUE!	#VALUE!
	1% dilution	0	0	Do not trust value		Chloroplast	#VALUE!	#VALUE!
	Negative control	0				Bacteria	#VALUE!	#VALUE!
						Fungi	#VALUE!	#VALUE!
Plant chloroplast DNA (rbcL)	100% library	0		Do not trust value
	10% dilution	0	0	Do not trust value			10% library
	1% dilution	0	0	Do not trust value		Min reliable Ct:	no good value	[unreliable shaded]
	Negative control	0					Cycles after min Ct	DNA Copies Relative to Max
						Plant nuclear	#VALUE!	#VALUE!
Bacteria DNA (16S rRNA)	100% library	0		Do not trust value		Chloroplast	#VALUE!	#VALUE!
	10% dilution	0	0	Do not trust value		Bacteria	#VALUE!	#VALUE!
	1% dilution	0	0	Do not trust value		Fungi	#VALUE!	#VALUE!
	Negative control	0
							1% library
Fungi DNA (18S rRNA)	100% library	0		Do not trust value		Min reliable Ct:	no good value	[unreliable shaded]
	10% dilution	0	0	Do not trust value			Cycles after min Ct	DNA Copies Relative to Max
	1% dilution	0	0	Do not trust value		Plant nuclear	#VALUE!	#VALUE!
	Negative control	0				Chloroplast	#VALUE!	#VALUE!
						Bacteria	#VALUE!	#VALUE!
						Fungi	#VALUE!	#VALUE!

[truncated: 2 more sheets: Sample 6, Sample 7]
